# Supplementary material
Source: PubMed Central journal article supplement (PMC3934345)
Supplement: peds.2013-3332_peds.2013-3332SupplementaryData.pdf [file peds.2013-3332_peds.2013-3332SupplementaryData.pdf]

## Supplemental Information

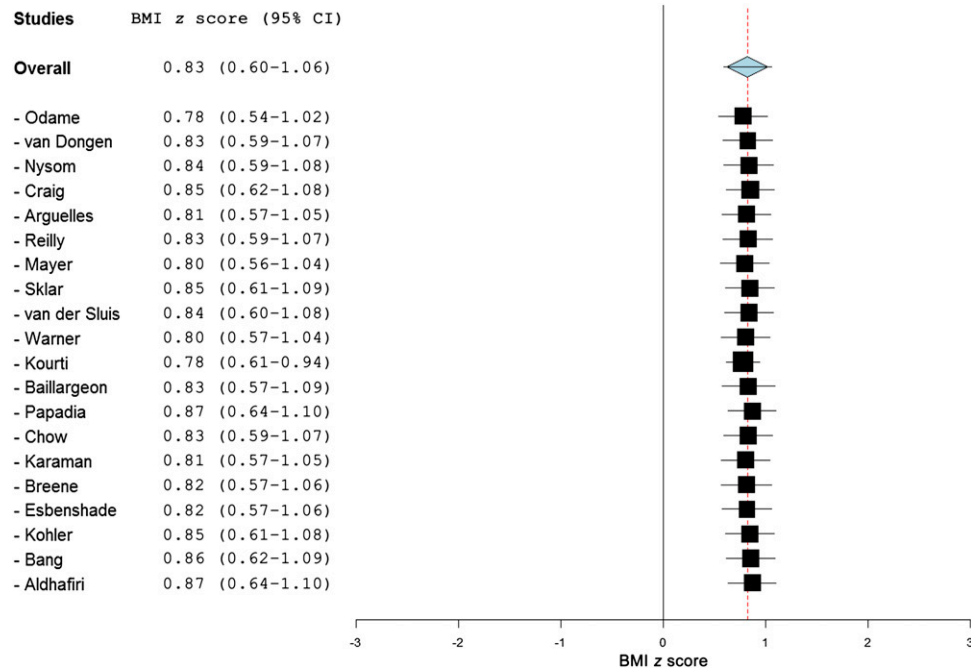

### SUPPLEMENTAL FIGURE 4

Leave-one-out meta-analysis of BMI z score in survivors of pediatric ALL.

**SUPPLEMENTAL TABLE 4** Quality Assessment of Studies Evaluating Prevalence of Obesity in Pediatric ALL Survivors

| Author, Year (Location)                | 1 | 2 | 3 | 4   | 5   | 6 | 7 | 8 | 9 | 10 | Maximum Score | Study Score |
|----------------------------------------|---|---|---|-----|-----|---|---|---|---|----|---------------|-------------|
| Zee et al 1986 (US)                    | 0 | 1 | 1 | 1   | 1   | 1 | 1 | 1 | 0 | 0  | 10            | 7           |
| Schell et al 1992 (US)                 | 1 | 1 | 1 | 1   | 1   | 1 | 1 | 1 | 1 | 0  | 10            | 9           |
| Odame et al 1994 (UK)                  | 1 | 1 | 1 | 1   | 0   | 1 | 1 | 1 | 1 | 1  | 10            | 9           |
| Van-Dongen et al 1995 (Netherlands)    | 0 | 1 | 1 | 1   | 0   | 1 | 0 | 1 | 1 | 1  | 10            | 7           |
| Didi et al 1995 (UK)                   | 1 | 1 | 1 | 1   | 1   | 1 | 1 | 1 | 1 | 1  | 10            | 10          |
| Davies et al 1995 (UK)                 | 0 | 1 | 0 | 0   | 1   | 1 | 1 | 1 | 1 | 1  | 10            | 7           |
| Groot-Loone et al 1996 (Netherlands)   | 1 | 1 | 1 | 1   | 1   | 1 | 1 | 1 | 1 | 1  | 10            | 10          |
| Birkebaek et al 1998 (Denmark)         | 1 | 1 | 1 | 1   | 1   | 1 | 1 | 1 | 1 | 0  | 10            | 9           |
| Craig et al 1999 (UK)                  | 1 | 1 | 1 | 1   | 0   | 1 | 1 | 1 | 1 | 1  | 10            | 9           |
| Nysom et al 1999 (Denmark)             | 1 | 1 | 1 | 1   | 1   | 1 | 1 | 1 | 1 | 0  | 10            | 9           |
| Brennan et al 1999 (UK)                | 1 | 1 | 1 | N/A | N/A | 0 | 0 | 1 | 1 | 1  | 8             | 6           |
| Arguelles et al 2000 (Spain)           | 1 | 1 | 1 | 1   | 1   | 1 | 1 | 1 | 1 | 0  | 10            | 9           |
| Reilly et al 2000 (UK)                 | 1 | 1 | 1 | 1   | 0   | 1 | 1 | 1 | 1 | 1  | 10            | 9           |
| Sklar et al 2000 (US)                  | 1 | 1 | 1 | 1   | 0   | 1 | 1 | 1 | 1 | 1  | 10            | 9           |
| Mayer et al 2000 (Germany)             | 1 | 1 | 1 | 1   | 0   | 1 | 1 | 1 | 1 | 0  | 10            | 8           |
| van der Sluis et al 2000 (Netherlands) | 1 | 1 | 1 | N/A | N/A | 1 | 1 | 1 | 1 | 1  | 8             | 8           |
| Shaw et al 2000 (UK)                   | 1 | 1 | 1 | N/A | N/A | 1 | 1 | 1 | 0 | 1  | 8             | 7           |
| Warner et al 2002 (UK)                 | 1 | 1 | 1 | N/A | N/A | 1 | 1 | 1 | 1 | 1  | 8             | 8           |
| Oeffinger et al 2003 (US)              | 1 | 1 | 1 | N/A | N/A | 1 | 0 | 1 | 1 | 1  | 8             | 7           |
| Kourti et al 2005 (Greece)             | 1 | 1 | 1 | N/A | N/A | 1 | 0 | 1 | 1 | 1  | 8             | 7           |
| Marinovic et al 2005 (France)          | 1 | 1 | 1 | 1   | 1   | 1 | 1 | 1 | 0 | 0  | 10            | 8           |
| Murphy et al 2006 (UK)                 | 1 | 1 | 1 | N/A | N/A | 1 | 1 | 1 | 1 | 0  | 8             | 7           |
| Papadia et al 2006 (Brazil)            | 1 | 1 | 1 | N/A | N/A | 1 | 1 | 1 | 1 | 0  | 8             | 7           |
| van Beek et al 2006 (Netherlands)      | 1 | 1 | 0 | N/A | N/A | 1 | 1 | 1 | 1 | 0  | 8             | 6           |
| Nathan et al 2006 (Canada)             | 1 | 1 | 1 | N/A | N/A | 1 | 1 | 1 | 1 | 1  | 8             | 8           |
| Baillargeon et al 2007 (US)            | 0 | 1 | 1 | 1   | 0   | 1 | 1 | 1 | 1 | 1  | 10            | 8           |
| Chow et al 2007 (US)                   | 1 | 1 | 1 | 1   | 1   | 1 | 1 | 1 | 1 | 1  | 10            | 10          |
| Razzouk et al 2007 (US)                | 1 | 1 | 1 | 1   | 1   | 1 | 1 | 1 | 1 | 1  | 10            | 10          |
| Trimis et al 2007 (Greece)             | 1 | 1 | 1 | N/A | N/A | 1 | 1 | 1 | 1 | 1  | 8             | 8           |
| Ness et al 2007 (US)                   | 1 | 1 | 1 | N/A | N/A | 1 | 1 | 1 | 1 | 1  | 8             | 8           |
| Asner et al 2008 (Switzerland)         | 0 | 0 | 1 | 1   | 1   | 1 | 1 | 1 | 0 | 1  | 10            | 7           |
| Garmey et al 2008 (US)                 | 1 | 1 | 1 | N/A | N/A | 1 | 1 | 1 | 1 | 1  | 8             | 8           |
| Withycombe et al 2009 (US)             | 1 | 1 | 1 | 1   | 1   | 1 | 1 | 1 | 1 | 1  | 10            | 10          |
| Collins et al 2010 (Canada)            | 1 | 1 | 1 | 1   | 1   | 0 | 0 | 1 | 1 | 1  | 10            | 8           |
| Pakakasama et al 2010 (Thailand)       | 1 | 1 | 1 | N/A | N/A | 0 | 0 | 1 | 0 | 1  | 8             | 5           |
| Karaman et al 2010 (Turkey)            | 1 | 1 | 1 | N/A | N/A | 1 | 0 | 1 | 1 | 1  | 8             | 7           |
| Tylavsky et al 2010 (US)               | 1 | 1 | 1 | N/A | N/A | 1 | 1 | 1 | 1 | 1  | 8             | 8           |
| Geenen et al 2010 (Netherlands)        | 1 | 1 | 1 | N/A | N/A | 1 | 1 | 1 | 0 | 1  | 8             | 7           |
| Breene et al 2011 (UK)                 | 1 | 1 | 1 | 1   | 1   | 1 | 1 | 1 | 1 | 1  | 10            | 10          |
| Esbenshade et al 2011 (US)             | 1 | 1 | 1 | 1   | 1   | 1 | 1 | 1 | 1 | 1  | 10            | 10          |
| Love et al 2011 (Canada)               | 1 | 1 | 0 | 1   | 1   | 1 | 1 | 1 | 1 | 1  | 10            | 9           |
| Kohler et al 2011 (UK)                 | 1 | 1 | 1 | N/A | N/A | 1 | 1 | 1 | 1 | 1  | 8             | 8           |
| Skoczen et al 2011 (Poland)            | 1 | 1 | 1 | 1   | 1   | 1 | 1 | 1 | 0 | 1  | 10            | 9           |
| Bang et al 2012 (Korea)                | 1 | 1 | 1 | 1   | 1   | 1 | 1 | 1 | 1 | 0  | 10            | 9           |
| Karakurt et al 2012 (Turkey)           | 1 | 1 | 1 | 1   | 1   | 1 | 1 | 1 | 1 | 1  | 10            | 10          |
| Aldhafiri et al 2012 (Saudi Arabia)    | 1 | 1 | 1 | N/A | N/A | 1 | 1 | 1 | 1 | 1  | 8             | 8           |
| Veringa et al 2012 (Netherlands)       | 1 | 1 | 1 | N/A | N/A | 1 | 1 | 1 | 1 | 1  | 8             | 8           |

Ten criteria (1–10) were used to assess the quality for longitudinal studies (maximum score = 10), and 8 criteria (1–3 and 6–10) were used to assess the quality for cross-sectional studies (maximum score = 8). The 10 criteria include the following: (1) Was survivors' age at evaluation clearly stated? (2) Was survivors' gender distribution clearly stated? (3) Was survivors' treatment protocol/years at diagnosis adequately described? (4) Was the length of follow-up stated? (5) Was the sample size at follow-up provided? (6) Was the source of reference population or selection of external controls adequately described? (7) Was it an appropriate reference population or was age and gender matching performed for external controls? (8) Was outcome clearly defined? (9) Were SD/SE/CI/P values for outcome provided? (10) Was subgroup analysis by CRT and gender performed? N/A: criterion was not evaluated in the study.
